# Supplementary material for: Ancestral population reconstitution from isofemale lines as a tool for experimental evolution
Source: PubMed Central journal article supplement (PMC5114691; doi:10.1002/ece3.2402), 2016-08-30
Supplement: ECE3-6-7169-s001.pdf [file ECE3-6-7169-s001.pdf]

## Supplementary Material

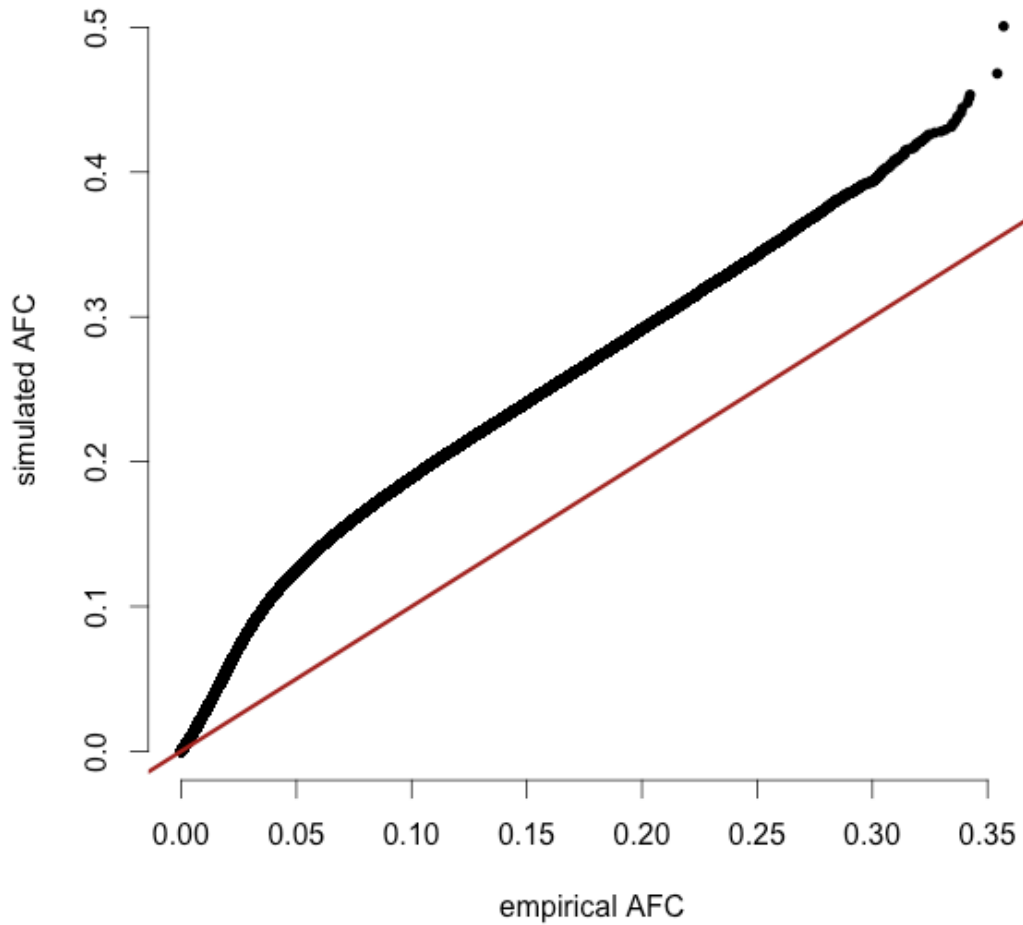

**Figure S1.** Quantile-Quantile plot of simulated versus empirical allele frequency changes (AFC) for *D. melanogaster*. Simulations assume four copies of each chromosome segregating in mated females (see main text for details). The identity line is displayed in red.

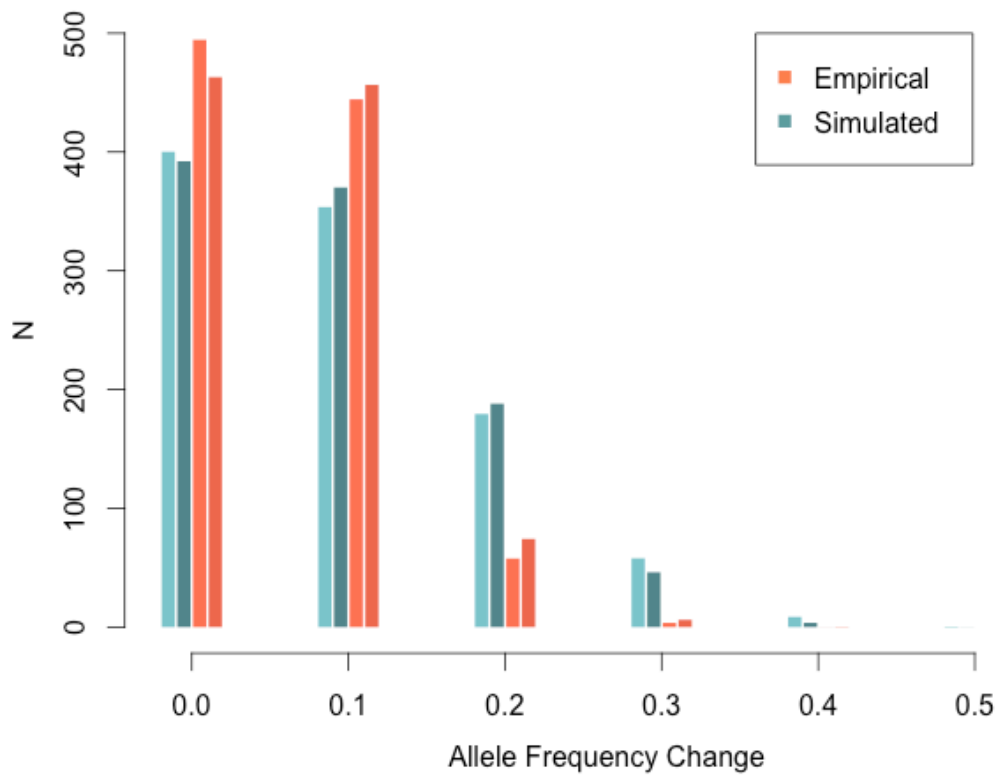

**Figure S2.** Distribution of simulated and empirical allele frequency changes (AFC) for *D. simulans*. Counts were normalized between simulated and empirical datasets. Each bar represents a replicate.
